# Supplementary material
Source: publisher figshare collection journal article supplement (https://tandf.figshare.com/ndownloader/files/17992187)
Supplement: Supplementary file 1 [file 17992187]

**Supplemental online material**

This supplementary material provides the references of the articles used in our literature search which retrieved ~1,200 fomepizole-treated patients to assess the most common reported adverse events attributed to fomepizole.

The following keywords were used:

1."fomepizole"[Substance Name] OR 4-methylpyrazole[tiab] OR fomepizole[tiab]

2.("Chemical Safety"[Mesh] OR "Treatment Outcome"[Mesh] OR "Drug Tolerance"[Mesh] OR"Ethylene Glycol/poisoning"[Mesh] OR methanol/poisoning[MESH] OR safety[TW] OR tolerance[TW] OR "methanol poisoning"[TW] OR "methanol intoxication"[TW] OR "Ethylene Glycol poisoning"[TW] OR "Ethylene Glycol intoxication"[TW]) AND ("fomepizole"[Supplementary Concept] OR fomepizole[TW] OR "4-methylpyrazole"[TW] OR "4-methyl pyrazole"[TW] OR Antizol[TW])

It also provides the data questionnaire survey used in our 16-year post-marketing study to assess fomepizole safety.

**Literature references with adverse reactions attributed to fomepizole administration**

1. Brent J, McMartin K, Phillips S, Burkhart KK, Donovan JW, Wells M, et al. Fomepizole for the Treatment of Ethylene Glycol Poisoning. N Engl J Med. 1999 Mar 18;340(11):832–8.
2. Brent J. Fomepizole for Ethylene Glycol and Methanol Poisoning. N Engl J Med. 2009 May 21;360(21):2216–23.
3. Brent J, McMartin K, Phillips S, Aaron C, Kulig K, Methylpyrazole for Toxic Alcohols Study Group. Fomepizole for the Treatment of Methanol Poisoning. N Engl J Med. 2001 Feb 8;344(6):424–9.
4. Jacobsen D, Sebastian CS, Barron SK, Carriere EW, McMartin KE. Effects of 4-methylpyrazole, methanol/ethylene glycol antidote, in healthy humans. J Emerg Med. 1990 8(4):455–61.
5. Jacobsen D, Mcmartin KE, Sebastian S, Blomstrand R. 4 methylpyrazole as therapy for toxic alcohol ingestion : safety in human volunteers following a single dose. 1989.
6. Lepik KJ, Levy AR, Sobolev BG, Purssell RA, DeWitt CR, Erhardt GD, et al. Adverse Drug Events Associated With the Antidotes for Methanol and Ethylene Glycol Poisoning: A Comparison of Ethanol and Fomepizole. Ann Emerg Med. 2009 Apr;53(4):439–450.e10.
7. Bekka R, Borron SW, Astier A, Sandouk P, Bismuth C, Baud FJ. Treatment of methanol and isopropanol poisoning with intravenous fomepizole. J Toxicol Clin Toxicol. 2001;39(1):59–67.
8. Harry P, Turcant A, Bouachour G, Houze P, Alquier P, Allain P. Efficacy of 4-Methylpyrazole in Ethylene Glycol Poisoning: Clinical and Toxicokinetic Aspects. Hum Exp Toxicol. 1994 Jan 6;13(1):61–4.
9. Baud FJ, Bismuth C, Garnier R, Galliot M, Astier A, Maistre G, et al. 4-Methylpyrazole may be an alternative to ethanol therapy for ethylene glycol intoxication in man. J Toxicol Clin Toxicol. 24(6):463–83.
10. Berleur M, Sarrut B, Guatel S. Le Point sur Fomépizole. Dossier du CNHIM. 1999.
11. McMartin KE, Jacobsen D, Sebastian S, Barron SK. Safety and metabolism of multiple doses of 4-methylpyrazole in humans. Vet Hum toxicol. 1988;30(4):363–4.
12. Borron SW, Mégarbane B, Baud FJ. Fomepizole in treatment of uncomplicated ethylene glycol poisoning. Lancet. 1999 Sep 4;354(9181):831.
13. Mégarbane B, Borrow S, Bismuth C, Baud FJ. Efficacité et tolérance du 4-methylpyrazole dans les intoxications à l’éthylene glycol. In: Congrès de la SRLF, 2000, Paris. 1999.
14. Mégarbane B, Houzé P, Baud FJ. Oral fomepizole administration to treat ethylene glycol and methanol poisonings: advantages and limitations. Clin Toxicol [Internet]. 2008 Jan;46(10):1097–1097. Available from: http://www.tandfonline.com/doi/full/10.1080/15563650802310911
15. Belson M, Morgan BW. Methanol toxicity in a newborn. J Toxicol Clin Toxicol [Internet]. 2004 [cited 2018 Sep 12];42(5):673–7.
16. McMartin KE, Dies DF, Sebastian C, Barron SK. Effects of intravenous 4-methylpyrazole in healhy human. Vet Hum Toxicol. 1989;31:330–80.
17. Beatty L, Green R, Magee K, Zed P. A systematic review of ethanol and fomepizole use in toxic alcohol ingestions. Emerg Med Int. 2013;2013:638057.
18. Algren D, Christian M. Thrombophlebitis associated with concentrated fomepizole administration. Clin Toxicol. 2014;52(7):759–60.
19. Lepik KJ, Brubacher JR, DeWitt CR, Lam GSS, Lawson EJ, Erhardt GD, et al. Bradycardia and hypotension associated with fomepizole infusion during hemodialysis. Clin Toxicol [Internet]. 2008 Jan 20;46(6):570–3.
20. Benitez JG, Swanson-Biearman B, Krenzelok EP, Krenzelok E. Nystagmus Secondary to Fomepizole Administration in a Pediatric Patient. J Toxicol Clin Toxicol. 2000 Jan 18;38(7):795–8.
21. Keeling T, Orozco B, Cole J, Nystrom P, Jouhari M. Anaphylaxis following fomepizole for ethylene glycol poisoning. Clin Toxicol [Internet]. 2014;52(7).
22. Brent J. Fomepizole for the treatment of pediatric ethylene and diethylene glycol, butoxyethanol, and methanol poisonings. Clin Toxicol. 2010;48(5):401–6.
23. Frémont D, Berleur M-P, Mégarbane B. Loading dose of fomepizole is safe in children with presumed toxic alcohol exposure - a case series. Basic Clin Pharmacol Toxicol. 2014;115:229–30.
24. Chen T-H, Kuo C-H, Huang C-T, Wang W-L. Use of Fomepizole in Pediatric Methanol Exposure: The First Case Report in Taiwan and a Literature Review. Pediatr Neonatol. 2016 Aug;57(4):351–4.
25. Caravati EM, Heileson HL, Jones M. Treatment of severe pediatric ethylene glycol intoxication without hemodialysis. - PubMed - NCBI. Clin Toxicol [Internet]. 2004;42(3):255–9.
26. Murphy N, Sonier T, Power D, Bona D. Treatment of severe pediatric ethylene glycol intoxication with fomepizole alone. Clin Toxicol. 2008;46(7):626.
27. Osterhoudt KC. Fomepizole therapy for pediatric butoxyethanol intoxication. J Toxicol Clin Toxicol [Internet]. 2002;40(7):929–30.
28. Lonati D, Chiara F, Scaravaggi G, Veronica B. Severe cardio-respiratory adverse effects after concentrated and rapid intravenous fomepizole administration: A case report. Clinical Toxicology.2015. 53(4):255-255
29. Druteika DP, Zed PJ, Ensom MH. Role of fomepizole in the management of ethylene glycol toxicity. Pharmacotherapy. 2002 Mar;22(3):365-72.

**Literature references with no adverse effects attributed to fomepizole administration**

1. Venn RM. Fomepizole for the treatment of ethylene glycol poisoning. Critical Care. 1999;42.
2. Piggor Z, Guinn A, Palatnick W, Tenenbein M. Recurrent Inhalational methanol toxicity during pregnancy. Clinical Toxicology. 2015; 53(7)
3. Marraffa J, Forrest A, Grant W, et al. Oral administration of fomepizole produces similar blood levels as identical intravenous dose. Clinical Toxicology. 2015; 46(2) 181-186
4. Barceloux DG, Krenzelok EP, Olson K, Watson W. American Academy of Clinical Toxicology Practice Guidelines on the Treatment of Ethylene Glycol Poisoning. Ad Hoc Committee. J Toxicol Clin Toxicol. 1999;37(5):537-60.
5. Battistella M. Fomepizole as an Antidote for Ethylene Glycol Poisoning. Annals of Pharmacotherapy. 2002. 36(6):1085-9
6. Baud F, Galliot M, Astier A, Dang Vu Bien et al. Treatment of Ethylene Glycol Poisoning with Intravenous 4-Methylpyrazole. N Engl J Med 1988; 319:97-100
7. Baum CR, Langman CB, Oker EE, Goldstein CA, Aviles SR, Makar JK. Fomepizole treatment of ethylene glycol poisoning in an infant. Pediatrics. 2000 Dec;106(6):1489-91.
8. Brent et al. 4-methylpyrazole (fomepizole) therapy of ethylene glycol poisoning: preliminary results of the meta trial.J Toxicology Clin Toxicol.1997;35:507
9. Brophy PD1, Tenenbein M, Gardner J, Bunchman TE, Smoyer WE. Childhood diethylene glycol poisoning treated with alcohol dehydrogenase inhibitor fomepizole and hemodialysis. Am J Kidney Dis. 2000 May;35(5):958-62.
10. Mandy J. Brown, Michael W. Shannon, Alan Woolf, Edward W. Boyer. Childhood Methanol Ingestion Treated With Fomepizole and Hemodialysis. Pediatrics. 2001.108(4)
11. Buchanan JA, Alhelail M, Cetaruk EW, Schaeffer TH, Palmer RB, Kulig K, Brent J. Massive ethylene glycol ingestion treated with fomepizole alone-a viable therapeutic option. J Med Toxicol. 2010 Jun;6(2):131-4
12. Burns MJ, Graudins A, Aaron CK, McMartin K, Brent J. Treatment of methanol poisoning with intravenous 4-methylpyrazole. Ann Emerg Med. 1997 Dec;30(6):829-32.
13. Rozenfeld RA, Leikin JB. Severe methanol ingestion treated successfully without hemodialysis. Am J Ther. 2007 Sep-Oct;14(5):502-3
14. De Brabander N, Wojciechowski M, De Decker K, De Weerdt A, Jorens PG. Fomepizole as a therapeutic strategy in paediatric methanol poisoning. A case report and review of the literature. Eur J Pediatr. 2005 Mar;164(3):158-61.
15. Leonard CP, Akhtar J. Co-ingestion of methanol and nitromethane: using falsely elevated creatinine as indicator for methanol antidote use. Pediatr Crit Care Med. 2007 Jul;8(4):392-3
16. Essama Mbia JJ, Guérit JM, Haufroid V, Hantson P. Fomepizole therapy for reversal of visual impairment after methanol poisoning: a case documented by visual evoked potentials investigation. Am J Ophthalmol. 2002 Dec;134(6):914-6
17. Davis DP, Bramwell KJ, Hamilton RS, Williams SR. Ethylene glycol poisoning: case report of a record-high level and a review. J Emerg Med. 1997 Sep-Oct;15(5):653-67
18. Green R. The management of severe toxic alcohol ingestions at a tertiary care center after the introduction of fomepizole. Am J Emerg Med. 2007 Sep;25(7):799-803
19. Hann G, Duncan D, Sudhir G, West P, Sohi D. Antifreeze on a freezing morning: ethylene glycol poisoning in a 2-year-old. BMJ Case Rep. 2012 Mar 27;2012
20. Hantson P, Hassoun A, Mahieu P. Ethylene glycol poisoning treated by intravenous 4-methylpyrazole. Intensive Care Med. 1998 Jul;24(7):736-9
21. Harbon S, Thompson JP. Successful use of fomepizole during second trimester of pregnancy. XXXIV International Congress of the EAPCCT. 2014
22. Harry P, Jobard E, Briand M, Caubet A, Turcant A. Massive poisoning in a child by antifreeze containing denatorium benzoate, treated by 4-methylpyrazole. 1996. Congrès international de toxicologie clinique, Marseille
23. Harry P, Jobard E, Briand M, Caubet A, Turcant A. Ethylene glycol poisoning in a child treated with 4-methylpyrazole. Pediatrics 1998;102;31
24. Hassanian-Moghaddam H, Pajoumand A, Dadgar SM, Shadnia Sh. Prognostic factors in methanol poisoning. Hum Exp Toxicol. 2007 Jul;26(7):583-6
25. Hazouard E, Ferrandière M, Paintaud G, Perrotin D. Delayed toxicity in acute ethanol-methanol copoisoning in a chronic alcohol abuser: usefulness of continuous 4-methylpyrazole (fomepizole) infusion. Intensive Care Med. 2000 Jun;26(6):827-8
26. Hovda KE, Froyshov S, Gudmundsdottir H, Rudberg N, Jacobsen D. Fomepizole may change indication for hemodialysis in methanol poisoning: prospective study in seven cases. Clin Nephrol. 2005 Sep;64(3):190-7
27. Jacobsen D, Sebastian CS, Blomstrand R, McMartin KE. 4-Methylpyrazole: a controlled study of safety in healthy human subjects after single, ascending doses. Alcohol Clin Exp Res. 1988 Aug;12(4):516-22
28. Jacobsen D, McMartin KE. Antidotes for methanol and ethylene glycol poisoning. J Toxicol Clin Toxicol. 1997;35(2):127-43
29. Jobard E, Harry P, Turcant A, Roy PM, Allain P. 4-Methylpyrazole and hemodialysis in ethylene glycol poisoning. J Toxicol Clin Toxicol. 1996;34(4):373-7
30. Laskey D, Morgan B. Inappropriate fomepizole administration results in unnecessary cost, easily avoidable. 2014 Annual Meeting of the NACCT
31. Lavoisier J, Boulle-Geronimi C1, Mégarbane B. Fatality associated with propylene glycol poisoning in a cirrhotic patient. Clin Toxicol (Phila). 2016 Jun;54(5):462-3
32. Leonard CP1, Akhtar J. Co-ingestion of methanol and nitromethane: using falsely elevated creatinine as indicator for methanol antidote use. Pediatr Crit Care Med. 2007 Jul;8(4):392-3
33. Levine M, Curry SC, Ruha AM, Pizon AF, Boyer E, Burns J, Bikin D, Gerkin RD. Ethylene glycol elimination kinetics and outcomes in patients managed without hemodialysis. Ann Emerg Med. 2012 Jun;59(6):527-31
34. Lindros KO, Stowell A, Pikkarainen P, Salaspuro M. The disulfiram (Antabuse)-Alcohol reaction in male alcoholics: its efficient management by 4-methylpyrazole. Alcohol Clin Exp Res. 1981 Fall;5(4):528-30.
35. McKeown N, Hurley WT, Hendrickson RG, WestEthylene glycol poisoning treated with fomepizole. Clinical Toxicology. 2009. 47(7):735-736
36. Megarbane B. Intoxication aiguë à l’éthylène glycol. Med Ther. 2001.7(2) :163-167
37. Mégarbane B, Borron SW, Trout H, Hantson P, Jaeger A, Krencker E, Bismuth C, Baud FJ. Treatment of acute methanol poisoning with fomepizole. Intensive Care Med. 2001 Aug;27(8):1370-8
38. Moreau CL, Kerns W 2nd, Tomaszewski CA, McMartin KE, Rose SR, Ford MD, Brent J. Glycolate kinetics and hemodialysis clearance in ethylene glycol poisoning. META Study Group. J Toxicol Clin Toxicol. 1998;36(7):659-66
39. Mycyk MB, DesLauriers C, Metz J, Wills B, Mazor SS. Compliance with poison center fomepizole recommendations is suboptimal in cases of toxic alcohol poisoning. Am J Ther. 2006 Nov-Dec;13(6):485-9
40. Najafi CC, Hertko LJ, Leikin JB, Korbet SM. Fomepizole in ethylene glycol intoxication. Ann Emerg Med. 2001 Mar;37(3):358-9.
41. Piggott Z, Guinn A, Tenenbein M, Palatnick W. Recurrent inhalational methanol toxicity during pregnancy. Clinical toxicology. 2015 Annual meeting of the NACCT 2015; 53 (7)
42. Pizon AF, Brooks DE. Hyperosmolality: another indication for hemodialysis following acute ethylene glycol poisoning. Clin Toxicol (Phila). 2006;44(2):181-3
43. Rastogi A, Itagaki B, Bajwa M, Kraut JA. Spurious elevation in serum creatinine caused by ingestion of nitromethane: implication for the diagnosis and treatment of methanol intoxication. Am J Kidney Dis. 2008 Jul;52(1):181-7
44. Riquier T, Geri G, Mongardon N, Bourgogne E, Pène F. False hyperlactatemia in life-threatening ethylene glycol poisoning. Ann Fr Anesth Reanim. 2014 Apr;33(4):e79-81
45. Salaspuro MP, Pikkarainen P, Lindros K. Ethanol-induced hypoglycaemia in man: its suppression by the alcohol dehydrogenase inhibitor 4-methylpyrazole. Eur J Clin Invest. 1977 Dec;7(6):487-90.
46. Salaspuro MP, Lindros KO, Pikkarainen PH. Effect of 4-methylpyrazole on ethanol elimination rate and hepatic redox changes in alcoholics with adequate or inadequate nutrition and in nonalcoholic controls. Metabolism. 1978 Jun;27(6):631-9.
47. Sande M, Thompson D, Monte AA. Fomepizole for severe disulfiram-ethanol reactions. A m J Emerg Med. 2012 Jan;30(1):262.e3-5
48. Sarkola T, Iles MR, Kohlenberg-Mueller K, Eriksson CJ. Ethanol, acetaldehyde, acetate, and lactate levels after alcohol intake in white men and women: effect of 4-methylpyrazole. Alcohol Clin Exp Res. 2002 Feb;26(2):239-45
49. Sivilotti ML, Burns MJ, McMartin KE, Brent J. Toxicokinetics of ethylene glycol during fomepizole therapy: implications for management. For the Methylpyrazole for Toxic Alcohols Study Group. Ann Emerg Med. 2000 Aug;36(2):114-25
50. Sivilotti ML1, Burns MJ, Aaron CK, McMartin KE, Brent J. Reversal of severe methanol-induced visual impairment: no evidence of retinal toxicity due to fomepizole. J Toxicol Clin Toxicol. 2001;39(6):627-31
51. Thanacoody RH, Gilfillan C, Bradberry SM, Davies J, Jackson G, Vale AJ, Thompson JP, Eddleston M, Thomas SH. Management of poisoning with ethylene glycol and methanol in the UK: a prospective study conducted by the National Poisons Information Service (NPIS). Clin Toxicol (Phila). 2016;54(2):134-40
52. Vasavada N, Williams C, Hellman RN. Ethylene glycol intoxication: case report and pharmacokinetic perspectives. Pharmacotherapy. 2003 Dec;23(12):1652-8
53. Velez LI, Kulstad E, Shepherd G, Roth B. lnhalational Methanol Toxicity in Pregnancy Treated Twice with Fomepizole. Vet Hum Toxicol. 2003 Feb;45(1):28-30.
54. Wang GS, Yin S, Shear B, Heard K. Severe poisoning after accidental pediatric ingestion of glycol ethers. Pediatrics. 2012 Oct;130(4):e1026-9
55. Weinman SA. A new antidote in review: fomepizole (Antizol). J Emerg Nurs. 1998 Aug;24(4):333-4.
56. Zakharov S1, Pelclova D, Navratil T, Belacek J, Komarc M, Eddleston M, Hovda KE. Fomepizole versus ethanol in the treatment of acute methanol poisoning: Comparison of clinical effectiveness in a mass poisoning outbreak. Clin Toxicol (Phila). 2015;53(8):797-806.
57. A Zosel, E Egelhoff, and K Heard. Severe Lactic Acidosis from Iatrogenic Propylene Glycol Overdose. Pharmacotherapy.2010;30(2):219
58. Buchanan JA, Alhelail M, Cetaruk EW, Schaeffer TH, Palmer RB, Kulig K, Brent J. Massive ethylene glycol ingestion treated with fomepizole alone-a viable therapeutic option. J Med Toxicol. 2010 Jun;6(2):131-4.

**REPLY COUPON**

**(Therapeutic use of FOMEPIZOLE AP-HP)**

**Date:** …………………….

**Hospital (name and stamp):**

………………………….……………………

**Name and signer position:** …………………………………………….

……………………………………………. ..

My order of …………….. (Month) was associated with:

- A storage renewal
- A treatment administration

In this case, please fill up the questionnaire here attached and specify the name of the physician in charge of the file: ........................................................………................

# Please return this reply coupon:

- by fax : **01.46.69.14.20** or

# - to the following address: UF Affaires réglementaires

7 rue du Fer à Moulin

75005 Paris

**data collection QUESTIONNAIRE**

**on therapeutic use of fomepizole aP-hp**

***To be filled by the physician and to be sent to the pharmacy for transmission to***

***AGEPS (Pharmaceutical Establishment of Paris Hospitals)***

***Regulatory, Pharmaceutical and Medical Affairs Department***

***7 rue du Fer à Moulin 75221 Paris cedex 05 or by fax : 01 46 69 14 20***

Name and status of the person who filled the questionnaire:

Details: phone: e-mail:

Hospital (name and address):

……………………………………………………………………………………………………………………………………………….

Unit: Date and signature:

**Patient identification**

First two letters of the last name First letter of the first name

Date of birth Sex Weight Date of admission

Date of the unit or the hospital discharge

Outcome:  alive  death If the patient is dead, cause of death:

- Intoxication:  no  yes

- Clinical context:  no  yes, in this case specify……………

……………………………………………………………………………………………………………………………………………

- other, specify: ………………………………………………………………

………………………………………………………………………………………………………………………………………………

**Patient medical history**

Neurological history:  no yes, specify:

Visual history:  no  yes, specify:

Renal history:  no  yes, specify:

Allergic history:  allergic to phenylbutazone  allergic to noramidopyrine

 Other allergies specify:

Chronic alcoholism:  no  yes

Other(s):

**Pharmaceuticals at the time of admission**

Specify the drug names and if possible the start dates of the pharmaceuticals:

**To complete in the case of a non-menopausal woman**

Date of last menstrual period: ……/……/……….. Effective contraception:  no  yes, specify …………………

Suspicion of pregnancy:  no  yes, if yes confirmation:  yes biological results:

 no

**Poisoning history**

**Ingestion of products containing** **one or more toxic alcohols (other than ethanol)**:

 yes Specify, if possible, name of the product, composition and quantity ingested:

 Ethylene glycol

 Methanol

 Other[[1]](#footnote-2)* (specify)

**Date(s) et hour(s) of the ingestion**

**Cause of the ingestion**: Accidental poisoning Suicidal/Voluntary poisoning

Combined intakes:

- ethanol:  yes, specify quantity/hour: ..............................................................  no  not known

- other toxics (medicines or other substances):

###### **Clinical examination at the admission**

Date and time of the examination Temperature Glasgow coma score

Respiratory rate Cardiac rate Systolic/Diastolic blood pressure

ECG  normal  abnormal - Specify:

**Main clinical signs**:  drunkenness  convulsion  drowsiness  coma

 Headache  nausea  vomiting  abdominal pain  anuria

 Visual abnormalities: - mydriasis :  no  yes  not specified

If yes, specify:  reactive pupils  areactive pupils

- Fundus examination:  no  yes

If yes, results: .

- Other (specify): .

 Respiratory abnormal pattern (specify):........................................  other (specify):

###### **Clinical outcome**

**Neurological symptoms**:  appearance  worsening  disappearance

Specify the nature of the symptoms and the timeframe:

**Visual symptoms**:  appearance  worsening  disappearance

Specify the nature of the symptoms and the timeframe:

……………………………………………………………………………………………………………………………………………………….

**Sequelae** (specify their nature and the dates of the examinations realized):

...............................................................................................................................................................................................................

……………………………………………………………………………………………..………………………………………………………………………………………………………………………………………………………………………………………………………………………………………………………………………………………………………….

###### **Biological examination at the admission**

###### Date and time of the examination arterial pH

###### Chemistry: Na mmol.l-1 K mmol.l-1 Cl mmol.l-1 HCO3 mmol.l-1

###### Lactates mmol.l-1 Anion gap mmol.l-1 Serum creatinine mol.l-1

###### **Biological evolution**

**Serum**

**creatinine**

Date Hour **Arterial pH** Date Hour **Anion gap** Date Hour

*Specify: calculation method and normal value of the anion gap*

*Unit of measurement of serum creatinine:*

###### **Toxicological examination at the admission and evolution**

**Plasmatic dosages**: *Caution: Specify the unit of measurement*

Date Hour **Ethylene glycol** Date Hour **Methanol** Date Hour **Ethanol**

If another toxicant was screened or measured, please specify:

Presence of oxalate crystals in the urines:  yes  no

###### **Treatments performed**

 **Treatment by Fomepizole** AP-HP 5 mg/ml, concentrate solution for infusion Number of doses administered:

Batch number(s) and expiry date(s) :

Date and time of the treatment initiation Treatment protocol follow-up[[2]](#footnote-3)*:  yes  no

If not, explain why (clinical worsening, occurrence of an undesirable effect, other route of administration, other dosing regimen…):

 **Hemodialysis**  **Other type of dialysis** (specify):

If yes, on what decision criteria?  clinical criteria  biological criteria  toxicological criteria

Specify the decision criteria:

Date and starting time; number and duration of the sessions:

 **Ethanol administration**:

*Cause*:  immediate availability  contraindication to fomepizole  undesirable effect under fomepizole

*Administration route*: ………………................................. *Dose*:

 **Folinic acid administration**  **Thiamine and pyridoxine administration**

**Symptomatic treatment** by the administration of:

 Bicarbonates  hydration solutions: polyionic and/or glucose solutions

 Diuretics  anticonvulsants  antipyretics  analgesic

###### **Undesirable effects related to Fomepizole AP-HP treatment**

**Have some undesirable effects potentially due to Fomepizole AP-HP been observed?**

** yes  no**. **If yes**, please specify the gravity criteria and check the appropriate boxes, circle the observed effects then fill in the table below corresponding to the care and evolution of the effects:

** Serious  Not Serious**

 Neurological effects: dizziness, lightheadedness, drunkenness, headache

 Digestive effects: nausea, vomiting

 Local effect: injection site pain, venous inflammation

 Allergic manifestations: pruritus, skin rash

 Biological abnormalities: increase of SGPT, increase of SGOT, hypereosinophilia

 Other:

| Type of effect and date | Treatment of the effect and duration of treatment | Evolution |
| --- | --- | --- |
|  |  | Recovery without sequelae   Recovery with sequelae, specify: ……   Subject not yet recovered   Unknown   Death due to the adverse effect |
|  |  |  Recovery without sequelae   Recovery with sequelae, specify: ……   Subject not yet recovered   Unknown   Death due to the adverse effect |

**Has the recommended biological monitoring of the treatment in SmPC of Fomepizole AP-HP been performed?**

 no  yes, specify the duration:

Any doctor or pharmacist who has noticed a serious or unexpected side effect likely to be due to fomepizole must make an immediate statement and at the latest within 24 hours to the AGEPS (AP-HP) near:

[pv.med@eps.aphp.fr](mailto:pv.med@eps.aphp.fr) or by phone 01 46 69 90 63 – fax 01 46 69 15 29

1. * Substances transformed into toxic metabolites under the effect of alcohol dehydrogenase, such as di- or tri-ethylene glycol, butoxyethanol, fluoropropanol, … [↑](#footnote-ref-2)
2. *slow intravenous injection of a loading dose of 15 mg/kg and then maintenance dose(s) every 12 hours either (if intoxication by ethylene glycol) according to the plasma level of the toxic (cf SmPC) either (if intoxication by methanol) doses of 10 mg/kg until the plasma concentration of methanol becomes undetectable [↑](#footnote-ref-3)
